# Supplementary material
Source: PubMed Central journal article supplement (PMC3369724)
Supplement: cn100066p_si_001.pdf [file cn100066p_si_001.pdf]

-in

- path
  - database minirosetta\_database #this is where your database lives
- file
  - s hSERT1.pdb #starting pdb. Note, you must have HETATM records in your pdb
  - extra\_res\_fa LG.params #this is the params file you made for your ligand. You must have a params file for each ligand in your pdb
- out
  - mute all #this will mute all output. If you are debugging, take this flag off
  - nstruct 100 #(the number of pdb files you are wanting to create)
- docking
  - uniform\_trans 4 #This is the initial placement step. How far from the center of the ligand do you want to sample? Sphere of radius 4 Angstrom
  - randomize2 #Use random conformation from your conformation library as initial placement
- packing # repacking rotamers around the ligand, not around the whole protein!
  - extrachi\_cutoff 1
  - ex1
  - ex1aro
  - ex2
- ligand
  - protocol abbrev2 #repack in cycles 1 and 4
  - improve\_orientation 1000 #This rotates/slides the ligand around in the pocket 1000 times then chooses the best position...powerful tool to use with rotamers
  - minimize\_ligand #minimize ligand rotatable bonds
  - harmonic\_torsions 10 #minimizes the ligand with one standard deviation equal to 10 degrees
  - minimize\_backbone #minimize backbone around ligand (stretches of residues w/in 6 Angstroms)
  - harmonic\_Calphas 0.3
  - soft\_rep #uses soft repulsive scoring during initial placement/searching of binding pocket. When minimizing, uses hard repulsive(high resolution scoring function)
  - old\_estat #only evaluate the Coulomb term between protein and ligand
  - tether\_ligand 0.1 #after initial placement, only allow the ligand to move by .1A

**S1:** Flags used for RosettaLigand docking. The command line used was: ligand\_dock.linuxgccrelease @flags.txt

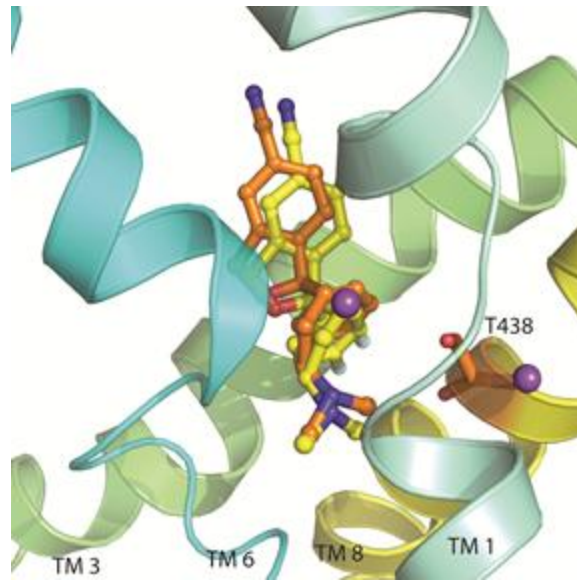

**S2:** S-citalopram/S438T-hSERT with Na<sup>+</sup> present. Wild type hSERT complexed with S-citalopram is shown in yellow. Mutant S438T hSERT is shown in orange. Na<sup>+</sup> ions are shown in purple. Na<sup>+</sup> ion coordinates were taken from the LeuT crystal structure 2A65. The resulting S-citalopram/hSERT models with both Na<sup>+</sup> ions present resulted in a 0.3 Å shift of the dimethyl-amine tail towards the Na<sup>+</sup> two site. The resulting Rosetta score was -8.8 REU compared to the -8.1 REU for the original model. The increase in score is attributed to better packing of residues against S-citalopram. When the S438T mutation is introduced into the hSERT model including S-citalopram and Na<sup>+</sup>, the resulting energy is -8.0 REU (as compared to -8.8 REU WT with Na<sup>+</sup> ions). The dimethyl-amine tail [c] is shifted away from residue T438. The shift of S-citalopram's dimethyl-amine tail [c] is the same result as seen without the Na<sup>+</sup> present in the S-citalopram /hSERT S438T model. The conclusion is that the Na<sup>+</sup> ions do not result in a significantly different docked position of S-citalopram.

| S-citalopram/hSERT |          |      |          | Andersen's Model |          |      |          |
|--------------------|----------|------|----------|------------------|----------|------|----------|
| mutation           | Upper    | Ki   | -ln(ki)  | mutation         | REU      | Ki   | -ln(ki)  |
| A169D              | -8.16441 | 103  | -4.63473 | A169D            | -6.27268 | 103  | -4.63473 |
| A169I              | -7.97825 | 9    | -2.19722 | A169I            | -7.62365 | 9    | -2.19722 |
| A169S              | -8.0122  | 26   | -3.2581  | A169S            | -7.39255 | 26   | -3.2581  |
| A173G              | -8.04718 | 7    | -1.94591 | A173G            | -7.24725 | 7    | -1.94591 |
| A173I              | -8.08233 | 31   | -3.43399 | A173I            | -7.00635 | 31   | -3.43399 |
| A173S              | -7.30289 | 7    | -1.94591 | A173S            | -7.37286 | 7    | -1.94591 |
| A441G              | -7.97508 | 12   | -2.48491 | A441G            | -8.13865 | 12   | -2.48491 |
| C166I              | -7.58802 | 34   | -3.52636 | C166I            | -7.61337 | 34   | -3.52636 |
| F170L              | -8.0881  | 22   | -3.09104 | F170L            | -7.91533 | 22   | -3.09104 |
| F335A              | -5.6068  | 30   | -3.4012  | F335A            | -6.75377 | 30   | -3.4012  |
| F335E              | -6.00514 | 16   | -2.77259 | F335E            | -7.54129 | 16   | -2.77259 |
| F335H              | -7.054   | 22   | -3.09104 | F335H            | -7.58296 | 22   | -3.09104 |
| F335I              | -6.12769 | 198  | -5.28827 | F335I            | -7.06384 | 198  | -5.28827 |
| F335W              | -6.57622 | 116  | -4.75359 | F335W            | -6.9065  | 116  | -4.75359 |
| F335Y              | -7.99716 | 21   | -3.04452 | F335Y            | -7.5074  | 21   | -3.04452 |
| F341A              | -8.04596 | 16   | -2.77259 | F341A            | -6.8588  | 16   | -2.77259 |
| F341I              | -8.25073 | 58   | -4.06044 | F341I            | -6.94841 | 58   | -4.06044 |
| F341L              | -8.01354 | 133  | -4.89035 | F341L            | -7.82786 | 133  | -4.89035 |
| F341Y              | -8.0535  | 1691 | -7.43308 | F341Y            | -6.02449 | 1691 | -7.43308 |
| G100A              | -7.15759 | 66   | -4.18965 | G100A            | -7.61848 | 66   | -4.18965 |
| G442A              | -6.66257 | 6    | -1.79176 | G442A            | -6.69277 | 6    | -1.79176 |
| G445A              | -8.13758 | 17   | -2.83321 | G445A            | -7.67601 | 17   | -2.83321 |
| I165N              | -7.46763 | 57   | -4.04305 | I165N            | -7.07692 | 57   | -4.04305 |
| I165V              | -7.99712 | 21   | -3.04452 | I165V            | -7.7427  | 21   | -3.04452 |
| I172A              | -8.08316 | 8    | -2.07944 | I172A            | -6.71586 | 8    | -2.07944 |
| I172E              | -7.67652 | 578  | -6.35957 | I172E            | -7.23447 | 578  | -6.35957 |
| I172F              | -8.64935 | 1687 | -7.43071 | I172F            | -5.43139 | 1687 | -7.43071 |
| I172Q              | -6.68379 | 77   | -4.34381 | I172Q            | -6.70788 | 77   | -4.34381 |
| I172V              | -7.36709 | 17   | -2.83321 | I172V            | -7.12462 | 17   | -2.83321 |
| L443A              | -7.966   | 30   | -3.4012  | L443A            | -7.12112 | 30   | -3.4012  |
| L443F              | -7.45638 | 30   | -3.4012  | L443F            | -7.63919 | 30   | -3.4012  |
| L443G              | -8.3491  | 8    | -2.07944 | L443G            | -7.96099 | 8    | -2.07944 |
| L443M              | -7.95557 | 8    | -2.07944 | L443M            | -6.11128 | 8    | -2.07944 |
| L443V              | -7.86685 | 8    | -2.07944 | L443V            | -5.29498 | 8    | -2.07944 |
| N177A              | -8.5494  | 158  | -5.0626  | N177A            | -6.91581 | 158  | -5.0626  |
| N177E              | -7.95533 | 15   | -2.70805 | N177E            | -7.46134 | 15   | -2.70805 |
| N177S              | -8.05422 | 332  | -5.80513 | N177S            | -7.85973 | 332  | -5.80513 |
| S174F              | -7.96368 | 23   | -3.13549 | S174F            | -6.79934 | 23   | -3.13549 |
| S438A              | -7.89379 | 89   | -4.48864 | S438A            | -7.31585 | 89   | -4.48864 |
| S438T              | -7.1424  | 7693 | -8.94807 | S438T            | -7.54486 | 7693 | -8.94807 |
| T439A              | -8.12008 | 4    | -1.38629 | T439A            | -7.33229 | 4    | -1.38629 |

|       |          |    |          |       |          |    |          |
|-------|----------|----|----------|-------|----------|----|----------|
| T439S | -8.31658 | 35 | -3.55535 | T439S | -7.02994 | 35 | -3.55535 |
| T439V | -7.30897 | 20 | -2.99573 | T439V | -8.14342 | 20 | -2.99573 |
| V343N | -7.49659 | 8  | -2.07944 | V343N | -7.00492 | 8  | -2.07944 |
| V343S | -8.04836 | 7  | -1.94591 | V343S | -7.62298 | 7  | -1.94591 |
| Y175F | -7.80679 | 6  | -1.79176 | Y175F | -7.68673 | 6  | -1.79176 |
| Y176F | -7.72629 | 23 | -3.13549 | Y176F | -7.32217 | 23 | -3.13549 |

**S3:** A comparison of mutations between the presented model and Andersen's models.

|             |    |     |     |   |   |        |        |        |      |      |
|-------------|----|-----|-----|---|---|--------|--------|--------|------|------|
| HETATM<br>C | 1  | C1  | LG1 | A | 1 | 0.868  | -1.527 | -1.046 | 1.00 | 0.00 |
| HETATM<br>N | 2  | N1  | LG1 | A | 1 | -0.462 | -6.712 | -1.597 | 1.00 | 0.00 |
| HETATM<br>O | 3  | O1  | LG1 | A | 1 | 2.722  | -0.490 | -0.074 | 1.00 | 0.00 |
| HETATM<br>C | 4  | C2  | LG1 | A | 1 | -0.361 | -1.854 | -1.602 | 1.00 | 0.00 |
| HETATM<br>N | 5  | N2  | LG1 | A | 1 | 2.115  | 3.375  | 2.025  | 1.00 | 0.00 |
| HETATM<br>C | 6  | C3  | LG1 | A | 1 | -0.696 | -3.205 | -1.747 | 1.00 | 0.00 |
| HETATM<br>C | 7  | C4  | LG1 | A | 1 | 0.194  | -4.213 | -1.332 | 1.00 | 0.00 |
| HETATM<br>C | 8  | C5  | LG1 | A | 1 | -0.170 | -5.595 | -1.478 | 1.00 | 0.00 |
| HETATM<br>C | 9  | C6  | LG1 | A | 1 | 1.428  | -3.869 | -0.770 | 1.00 | 0.00 |
| HETATM<br>C | 10 | C7  | LG1 | A | 1 | 1.741  | -2.523 | -0.633 | 1.00 | 0.00 |
| HETATM<br>C | 11 | C8  | LG1 | A | 1 | 2.961  | -1.916 | -0.056 | 1.00 | 0.00 |
| HETATM<br>C | 12 | C9  | LG1 | A | 1 | 0.603  | 0.589  | 0.297  | 1.00 | 0.00 |
| HETATM<br>C | 13 | C10 | LG1 | A | 1 | 1.322  | 1.043  | 1.582  | 1.00 | 0.00 |
| HETATM<br>C | 14 | C11 | LG1 | A | 1 | 2.444  | 2.052  | 1.363  | 1.00 | 0.00 |
| HETATM<br>C | 15 | C12 | LG1 | A | 1 | 1.465  | -0.175 | -0.749 | 1.00 | 0.00 |
| HETATM<br>C | 16 | C13 | LG1 | A | 1 | 2.284  | 2.082  | -4.375 | 1.00 | 0.00 |
| HETATM<br>C | 17 | C14 | LG1 | A | 1 | 0.993  | 1.649  | -4.115 | 1.00 | 0.00 |
| HETATM<br>C | 18 | C15 | LG1 | A | 1 | 0.729  | 0.930  | -2.946 | 1.00 | 0.00 |
| HETATM<br>C | 19 | C16 | LG1 | A | 1 | 1.756  | 0.623  | -2.029 | 1.00 | 0.00 |

|             |    |     |     |   |   |        |        |        |      |      |
|-------------|----|-----|-----|---|---|--------|--------|--------|------|------|
| HETATM<br>C | 20 | C17 | LG1 | A | 1 | 3.053  | 1.095  | -2.318 | 1.00 | 0.00 |
| HETATM<br>C | 21 | C18 | LG1 | A | 1 | 3.316  | 1.815  | -3.487 | 1.00 | 0.00 |
| HETATM<br>C | 22 | C19 | LG1 | A | 1 | 1.782  | 4.423  | 0.995  | 1.00 | 0.00 |
| HETATM<br>C | 23 | C20 | LG1 | A | 1 | 3.190  | 3.864  | 2.959  | 1.00 | 0.00 |
| HETATM<br>F | 24 | F1  | LG1 | A | 1 | 2.537  | 2.771  | -5.495 | 1.00 | 0.00 |
| HETATM<br>H | 25 | H1  | LG1 | A | 1 | -1.062 | -1.089 | -1.920 | 1.00 | 0.00 |
| HETATM<br>H | 26 | H2  | LG1 | A | 1 | -1.659 | -3.466 | -2.181 | 1.00 | 0.00 |
| HETATM<br>H | 27 | H3  | LG1 | A | 1 | 2.127  | -4.633 | -0.441 | 1.00 | 0.00 |
| HETATM<br>H | 28 | H4  | LG1 | A | 1 | 3.847  | -2.129 | -0.660 | 1.00 | 0.00 |
| HETATM<br>H | 29 | H5  | LG1 | A | 1 | 3.124  | -2.224 | 0.981  | 1.00 | 0.00 |
| HETATM<br>H | 30 | H6  | LG1 | A | 1 | 0.086  | 1.444  | -0.153 | 1.00 | 0.00 |
| HETATM<br>H | 31 | H7  | LG1 | A | 1 | -0.199 | -0.081 | 0.641  | 1.00 | 0.00 |
| HETATM<br>H | 32 | H8  | LG1 | A | 1 | 1.709  | 0.157  | 2.098  | 1.00 | 0.00 |
| HETATM<br>H | 33 | H9  | LG1 | A | 1 | 0.567  | 1.476  | 2.249  | 1.00 | 0.00 |
| HETATM<br>H | 34 | H10 | LG1 | A | 1 | 1.263  | 3.240  | 2.587  | 1.00 | 0.00 |
| HETATM<br>H | 35 | H11 | LG1 | A | 1 | 2.556  | 2.258  | 0.293  | 1.00 | 0.00 |
| HETATM<br>H | 36 | H12 | LG1 | A | 1 | 3.398  | 1.719  | 1.780  | 1.00 | 0.00 |
| HETATM<br>H | 37 | H13 | LG1 | A | 1 | 0.196  | 1.874  | -4.818 | 1.00 | 0.00 |
| HETATM<br>H | 38 | H14 | LG1 | A | 1 | -0.293 | 0.606  | -2.762 | 1.00 | 0.00 |
| HETATM<br>H | 39 | H15 | LG1 | A | 1 | 3.881  | 0.918  | -1.636 | 1.00 | 0.00 |
| HETATM<br>H | 40 | H16 | LG1 | A | 1 | 4.318  | 2.173  | -3.705 | 1.00 | 0.00 |
| HETATM<br>H | 41 | H17 | LG1 | A | 1 | 0.940  | 4.061  | 0.400  | 1.00 | 0.00 |
| HETATM<br>H | 42 | H18 | LG1 | A | 1 | 2.663  | 4.589  | 0.369  | 1.00 | 0.00 |
| HETATM<br>H | 43 | H19 | LG1 | A | 1 | 1.495  | 5.339  | 1.520  | 1.00 | 0.00 |
| HETATM<br>H | 44 | H20 | LG1 | A | 1 | 4.126  | 3.952  | 2.399  | 1.00 | 0.00 |
| HETATM<br>H | 45 | H21 | LG1 | A | 1 | 3.286  | 3.154  | 3.783  | 1.00 | 0.00 |







































|           |     |      |       |    |        |        |        |      |      |
|-----------|-----|------|-------|----|--------|--------|--------|------|------|
| ATOM<br>H | 488 | 3HG2 | VAL X | 30 | 12.091 | -7.837 | 21.848 | 1.00 | 0.00 |
| ATOM<br>N | 489 | N    | VAL X | 31 | 11.273 | -6.682 | 26.762 | 1.00 | 0.00 |
| ATOM<br>C | 490 | CA   | VAL X | 31 | 10.676 | -6.826 | 28.084 | 1.00 | 0.00 |
| ATOM<br>C | 491 | C    | VAL X | 31 | 9.256  | -6.279 | 28.113 | 1.00 | 0.00 |
| ATOM<br>O | 492 | O    | VAL X | 31 | 8.915  | -5.365 | 27.359 | 1.00 | 0.00 |
| ATOM<br>C | 493 | CB   | VAL X | 31 | 11.511 | -6.111 | 29.163 | 1.00 | 0.00 |
| ATOM<br>C | 494 | CG1  | VAL X | 31 | 12.888 | -6.746 | 29.277 | 1.00 | 0.00 |
| ATOM<br>C | 495 | CG2  | VAL X | 31 | 11.632 | -4.628 | 28.847 | 1.00 | 0.00 |
| ATOM<br>H | 496 | H    | VAL X | 31 | 11.567 | -5.767 | 26.452 | 1.00 | 0.00 |
| ATOM<br>H | 497 | HA   | VAL X | 31 | 10.575 | -7.876 | 28.361 | 1.00 | 0.00 |
| ATOM<br>H | 498 | HB   | VAL X | 31 | 10.994 | -6.188 | 30.120 | 1.00 | 0.00 |
| ATOM<br>H | 499 | 1HG1 | VAL X | 31 | 13.464 | -6.229 | 30.045 | 1.00 | 0.00 |
| ATOM<br>H | 500 | 2HG1 | VAL X | 31 | 12.784 | -7.796 | 29.550 | 1.00 | 0.00 |
| ATOM<br>H | 501 | 3HG1 | VAL X | 31 | 13.406 | -6.667 | 28.321 | 1.00 | 0.00 |
| ATOM<br>H | 502 | 1HG2 | VAL X | 31 | 12.225 | -4.138 | 29.620 | 1.00 | 0.00 |
| ATOM<br>H | 503 | 2HG2 | VAL X | 31 | 12.121 | -4.503 | 27.881 | 1.00 | 0.00 |
| ATOM<br>H | 504 | 3HG2 | VAL X | 31 | 10.639 | -4.179 | 28.812 | 1.00 | 0.00 |
| ATOM<br>N | 505 | N    | PRO X | 32 | 8.428  | -6.845 | 28.984 | 1.00 | 0.00 |
| ATOM<br>C | 506 | CA   | PRO X | 32 | 8.852  | -7.940 | 29.846 | 1.00 | 0.00 |
| ATOM<br>C | 507 | C    | PRO X | 32 | 8.807  | -9.271 | 29.105 | 1.00 | 0.00 |
| ATOM<br>O | 508 | O    | PRO X | 32 | 7.983  | -9.468 | 28.212 | 1.00 | 0.00 |
| ATOM<br>C | 509 | CB   | PRO X | 32 | 7.862  | -7.898 | 31.022 | 1.00 | 0.00 |
| ATOM<br>C | 510 | CG   | PRO X | 32 | 6.590  | -7.344 | 30.440 | 1.00 | 0.00 |
| ATOM<br>C | 511 | CD   | PRO X | 32 | 7.215  | -6.182 | 29.484 | 1.00 | 0.00 |
| ATOM<br>H | 512 | HA   | PRO X | 32 | 9.784  | -7.787 | 30.161 | 1.00 | 0.00 |
| ATOM<br>H | 513 | 1HB  | PRO X | 32 | 7.721  | -8.792 | 31.157 | 1.00 | 0.00 |

























|           |     |     |     |   |    |        |        |        |      |      |
|-----------|-----|-----|-----|---|----|--------|--------|--------|------|------|
| ATOM<br>H | 774 | 2HG | PRO | X | 51 | -1.034 | -1.605 | 28.987 | 1.00 | 0.00 |
| ATOM<br>H | 775 | 1HD | PRO | X | 51 | -1.317 | -3.836 | 27.958 | 1.00 | 0.00 |
| ATOM<br>H | 776 | 2HD | PRO | X | 51 | 0.046  | -2.973 | 27.720 | 1.00 | 0.00 |
| ATOM<br>N | 777 | N   | SER | X | 52 | 0.593  | -4.773 | 32.640 | 1.00 | 0.00 |
| ATOM<br>C | 778 | CA  | SER | X | 52 | 0.000  | -5.382 | 33.823 | 1.00 | 0.00 |
| ATOM<br>C | 779 | C   | SER | X | 52 | 0.458  | -4.677 | 35.095 | 1.00 | 0.00 |
| ATOM<br>O | 780 | O   | SER | X | 52 | 1.648  | -4.655 | 35.413 | 1.00 | 0.00 |
| ATOM<br>C | 781 | CB  | SER | X | 52 | 0.349  | -6.856 | 33.882 | 1.00 | 0.00 |
| ATOM<br>O | 782 | OG  | SER | X | 52 | -0.168 | -7.474 | 35.027 | 1.00 | 0.00 |
| ATOM<br>H | 783 | H   | SER | X | 52 | 1.511  | -4.357 | 32.708 | 1.00 | 0.00 |
| ATOM<br>H | 784 | HA  | SER | X | 52 | -1.089 | -5.418 | 33.791 | 1.00 | 0.00 |
| ATOM<br>H | 785 | 1HB | SER | X | 52 | -0.059 | -7.346 | 32.999 | 1.00 | 0.00 |
| ATOM<br>H | 786 | 2HB | SER | X | 52 | 1.434  | -6.959 | 33.885 | 1.00 | 0.00 |
| ATOM<br>H | 787 | HG  | SER | X | 52 | 0.190  | -7.051 | 35.811 | 1.00 | 0.00 |
| ATOM<br>N | 788 | N   | PRO | X | 53 | -0.493 | -4.099 | 35.818 | 1.00 | 0.00 |
| ATOM<br>C | 789 | CA  | PRO | X | 53 | -1.896 | -4.152 | 35.422 | 1.00 | 0.00 |
| ATOM<br>C | 790 | C   | PRO | X | 53 | -2.167 | -3.245 | 34.230 | 1.00 | 0.00 |
| ATOM<br>O | 791 | O   | PRO | X | 53 | -1.564 | -2.182 | 34.093 | 1.00 | 0.00 |
| ATOM<br>C | 792 | CB  | PRO | X | 53 | -2.659 | -3.699 | 36.678 | 1.00 | 0.00 |
| ATOM<br>C | 793 | CG  | PRO | X | 53 | -1.699 | -2.805 | 37.414 | 1.00 | 0.00 |
| ATOM<br>C | 794 | CD  | PRO | X | 53 | -0.321 | -3.576 | 37.179 | 1.00 | 0.00 |
| ATOM<br>H | 795 | HA  | PRO | X | 53 | -2.146 | -5.083 | 35.172 | 1.00 | 0.00 |
| ATOM<br>H | 796 | 1HB | PRO | X | 53 | -3.291 | -3.154 | 36.306 | 1.00 | 0.00 |
| ATOM<br>H | 797 | 2HB | PRO | X | 53 | -2.714 | -4.442 | 37.118 | 1.00 | 0.00 |
| ATOM<br>H | 798 | 1HG | PRO | X | 53 | -1.664 | -2.060 | 37.014 | 1.00 | 0.00 |
| ATOM<br>H | 799 | 2HG | PRO | X | 53 | -1.747 | -3.028 | 38.324 | 1.00 | 0.00 |





































































































|           |      |      |           |        |        |        |      |      |
|-----------|------|------|-----------|--------|--------|--------|------|------|
| ATOM<br>H | 1970 | 1HD1 | ILE X 130 | 8.395  | 0.656  | 15.775 | 1.00 | 0.00 |
| ATOM<br>H | 1971 | 2HD1 | ILE X 130 | 10.047 | 0.035  | 15.530 | 1.00 | 0.00 |
| ATOM<br>H | 1972 | 3HD1 | ILE X 130 | 9.794  | 1.722  | 16.039 | 1.00 | 0.00 |
| ATOM<br>N | 1973 | N    | PRO X 131 | 13.059 | 1.823  | 11.516 | 1.00 | 0.00 |
| ATOM<br>C | 1974 | CA   | PRO X 131 | 14.308 | 2.434  | 11.044 | 1.00 | 0.00 |
| ATOM<br>C | 1975 | C    | PRO X 131 | 14.297 | 2.854  | 9.574  | 1.00 | 0.00 |
| ATOM<br>O | 1976 | O    | PRO X 131 | 14.848 | 3.898  | 9.221  | 1.00 | 0.00 |
| ATOM<br>C | 1977 | CB   | PRO X 131 | 15.372 | 1.350  | 11.287 | 1.00 | 0.00 |
| ATOM<br>C | 1978 | CG   | PRO X 131 | 14.835 | 0.527  | 12.425 | 1.00 | 0.00 |
| ATOM<br>C | 1979 | CD   | PRO X 131 | 13.259 | 0.436  | 11.947 | 1.00 | 0.00 |
| ATOM<br>H | 1980 | HA   | PRO X 131 | 14.509 | 3.254  | 11.572 | 1.00 | 0.00 |
| ATOM<br>H | 1981 | 1HB  | PRO X 131 | 15.277 | 0.846  | 10.529 | 1.00 | 0.00 |
| ATOM<br>H | 1982 | 2HB  | PRO X 131 | 16.026 | 1.825  | 11.595 | 1.00 | 0.00 |
| ATOM<br>H | 1983 | 1HG  | PRO X 131 | 14.215 | 0.030  | 12.128 | 1.00 | 0.00 |
| ATOM<br>H | 1984 | 2HG  | PRO X 131 | 15.544 | 0.361  | 13.014 | 1.00 | 0.00 |
| ATOM<br>H | 1985 | 1HD  | PRO X 131 | 12.533 | -0.031 | 11.544 | 1.00 | 0.00 |
| ATOM<br>H | 1986 | 2HD  | PRO X 131 | 13.265 | 0.510  | 12.896 | 1.00 | 0.00 |
| ATOM<br>N | 1987 | N    | LEU X 132 | 13.660 | 2.065  | 8.713  | 1.00 | 0.00 |
| ATOM<br>C | 1988 | CA   | LEU X 132 | 13.604 | 2.428  | 7.301  | 1.00 | 0.00 |
| ATOM<br>C | 1989 | C    | LEU X 132 | 12.846 | 3.729  | 7.076  | 1.00 | 0.00 |
| ATOM<br>O | 1990 | O    | LEU X 132 | 13.243 | 4.539  | 6.247  | 1.00 | 0.00 |
| ATOM<br>C | 1991 | CB   | LEU X 132 | 12.958 | 1.300  | 6.489  | 1.00 | 0.00 |
| ATOM<br>C | 1992 | CG   | LEU X 132 | 13.836 | 0.060  | 6.282  | 1.00 | 0.00 |
| ATOM<br>C | 1993 | CD1  | LEU X 132 | 13.021 | -1.056 | 5.643  | 1.00 | 0.00 |
| ATOM<br>C | 1994 | CD2  | LEU X 132 | 15.030 | 0.422  | 5.410  | 1.00 | 0.00 |
| ATOM<br>H | 1995 | H    | LEU X 132 | 13.215 | 1.218  | 9.036  | 1.00 | 0.00 |



|           |      |      |           |        |        |       |      |      |
|-----------|------|------|-----------|--------|--------|-------|------|------|
| ATOM<br>H | 1996 | HA   | LEU X 132 | 14.613 | 2.599  | 6.928 | 1.00 | 0.00 |
| ATOM<br>H | 1997 | 1HB  | LEU X 132 | 12.125 | 1.061  | 7.147 | 1.00 | 0.00 |
| ATOM<br>H | 1998 | 2HB  | LEU X 132 | 12.575 | 1.658  | 5.534 | 1.00 | 0.00 |
| ATOM<br>H | 1999 | HG   | LEU X 132 | 14.215 | -0.236 | 7.260 | 1.00 | 0.00 |
| ATOM<br>H | 2000 | 1HD1 | LEU X 132 | 13.653 | -1.933 | 5.499 | 1.00 | 0.00 |
| ATOM<br>H | 2001 | 2HD1 | LEU X 132 | 12.185 | -1.315 | 6.293 | 1.00 | 0.00 |
| ATOM<br>H | 2002 | 3HD1 | LEU X 132 | 12.641 | -0.723 | 4.678 | 1.00 | 0.00 |
| ATOM<br>H | 2003 | 1HD2 | LEU X 132 | 15.653 | -0.460 | 5.264 | 1.00 | 0.00 |
| ATOM<br>H | 2004 | 2HD2 | LEU X 132 | 14.679 | 0.783  | 4.443 | 1.00 | 0.00 |
| ATOM<br>H | 2005 | 3HD2 | LEU X 132 | 15.615 | 1.200  | 5.899 | 1.00 | 0.00 |
| ATOM<br>N | 2006 | N    | PHE X 133 | 11.747 | 3.935  | 7.799 | 1.00 | 0.00 |
| ATOM<br>C | 2007 | CA   | PHE X 133 | 10.994 | 5.178  | 7.644 | 1.00 | 0.00 |
| ATOM<br>C | 2008 | C    | PHE X 133 | 11.902 | 6.350  | 8.025 | 1.00 | 0.00 |
| ATOM<br>O | 2009 | O    | PHE X 133 | 11.938 | 7.368  | 7.336 | 1.00 | 0.00 |
| ATOM<br>C | 2010 | CB   | PHE X 133 | 9.730  | 5.168  | 8.504 | 1.00 | 0.00 |
| ATOM<br>C | 2011 | CG   | PHE X 133 | 8.865  | 6.383  | 8.327 | 1.00 | 0.00 |
| ATOM<br>C | 2012 | CD1  | PHE X 133 | 9.298  | 7.455  | 7.559 | 1.00 | 0.00 |
| ATOM<br>C | 2013 | CD2  | PHE X 133 | 7.617  | 6.457  | 8.927 | 1.00 | 0.00 |
| ATOM<br>C | 2014 | CE1  | PHE X 133 | 8.504  | 8.573  | 7.395 | 1.00 | 0.00 |
| ATOM<br>C | 2015 | CE2  | PHE X 133 | 6.821  | 7.574  | 8.764 | 1.00 | 0.00 |
| ATOM<br>C | 2016 | CZ   | PHE X 133 | 7.265  | 8.633  | 7.997 | 1.00 | 0.00 |
| ATOM<br>H | 2017 | H    | PHE X 133 | 11.434 | 3.233  | 8.455 | 1.00 | 0.00 |
| ATOM<br>H | 2018 | HA   | PHE X 133 | 10.704 | 5.307  | 6.600 | 1.00 | 0.00 |
| ATOM<br>H | 2019 | 1HB  | PHE X 133 | 9.113  | 4.307  | 8.254 | 1.00 | 0.00 |
| ATOM<br>H | 2020 | 2HB  | PHE X 133 | 9.997  | 5.127  | 9.561 | 1.00 | 0.00 |
| ATOM<br>H | 2021 | HD1  | PHE X 133 | 10.278 | 7.407  | 7.082 | 1.00 | 0.00 |



























































































































































































































































































































































































































































































































































































































































































































































































































































































|           |      |      |     |   |     |        |        |       |      |      |
|-----------|------|------|-----|---|-----|--------|--------|-------|------|------|
| ATOM<br>C | 1993 | CD1  | LEU | X | 132 | 12.822 | -1.037 | 6.417 | 1.00 | 0.00 |
| ATOM<br>C | 1994 | CD2  | LEU | X | 132 | 14.729 | 0.583  | 6.313 | 1.00 | 0.00 |
| ATOM<br>H | 1995 | H    | LEU | X | 132 | 12.557 | 1.380  | 9.725 | 1.00 | 0.00 |
| ATOM<br>H | 1996 | HA   | LEU | X | 132 | 14.008 | 2.790  | 7.656 | 1.00 | 0.00 |
| ATOM<br>H | 1997 | 1HB  | LEU | X | 132 | 11.640 | 1.057  | 7.762 | 1.00 | 0.00 |
| ATOM<br>H | 1998 | 2HB  | LEU | X | 132 | 12.177 | 1.621  | 6.163 | 1.00 | 0.00 |
| ATOM<br>H | 1999 | HG   | LEU | X | 132 | 13.793 | -0.076 | 8.105 | 1.00 | 0.00 |
| ATOM<br>H | 2000 | 1HD1 | LEU | X | 132 | 13.528 | -1.866 | 6.367 | 1.00 | 0.00 |
| ATOM<br>H | 2001 | 2HD1 | LEU | X | 132 | 11.950 | -1.339 | 6.998 | 1.00 | 0.00 |
| ATOM<br>H | 2002 | 3HD1 | LEU | X | 132 | 12.510 | -0.765 | 5.410 | 1.00 | 0.00 |
| ATOM<br>H | 2003 | 1HD2 | LEU | X | 132 | 15.427 | -0.253 | 6.259 | 1.00 | 0.00 |
| ATOM<br>H | 2004 | 2HD2 | LEU | X | 132 | 14.446 | 0.886  | 5.305 | 1.00 | 0.00 |
| ATOM<br>H | 2005 | 3HD2 | LEU | X | 132 | 15.206 | 1.421  | 6.823 | 1.00 | 0.00 |
| ATOM<br>N | 2006 | N    | PHE | X | 133 | 11.005 | 3.921  | 8.329 | 1.00 | 0.00 |
| ATOM<br>C | 2007 | CA   | PHE | X | 133 | 10.163 | 5.089  | 8.077 | 1.00 | 0.00 |
| ATOM<br>C | 2008 | C    | PHE | X | 133 | 10.975 | 6.346  | 8.385 | 1.00 | 0.00 |
| ATOM<br>O | 2009 | O    | PHE | X | 133 | 11.082 | 7.246  | 7.549 | 1.00 | 0.00 |
| ATOM<br>C | 2010 | CB   | PHE | X | 133 | 8.890  | 5.021  | 8.922 | 1.00 | 0.00 |
| ATOM<br>C | 2011 | CG   | PHE | X | 133 | 8.015  | 6.235  | 8.799 | 1.00 | 0.00 |
| ATOM<br>C | 2012 | CD1  | PHE | X | 133 | 8.401  | 7.309  | 8.009 | 1.00 | 0.00 |
| ATOM<br>C | 2013 | CD2  | PHE | X | 133 | 6.804  | 6.308  | 9.470 | 1.00 | 0.00 |
| ATOM<br>C | 2014 | CE1  | PHE | X | 133 | 7.598  | 8.427  | 7.894 | 1.00 | 0.00 |
| ATOM<br>C | 2015 | CE2  | PHE | X | 133 | 5.997  | 7.424  | 9.355 | 1.00 | 0.00 |
| ATOM<br>C | 2016 | CZ   | PHE | X | 133 | 6.396  | 8.485  | 8.567 | 1.00 | 0.00 |
| ATOM<br>H | 2017 | H    | PHE | X | 133 | 10.727 | 3.235  | 9.016 | 1.00 | 0.00 |
| ATOM<br>H | 2018 | HA   | PHE | X | 133 | 9.882  | 5.122  | 7.023 | 1.00 | 0.00 |



|           |      |     |     |   |     |        |        |        |      |      |
|-----------|------|-----|-----|---|-----|--------|--------|--------|------|------|
| ATOM<br>H | 2019 | 1HB | PHE | X | 133 | 8.284  | 4.167  | 8.620  | 1.00 | 0.00 |
| ATOM<br>H | 2020 | 2HB | PHE | X | 133 | 9.145  | 4.929  | 9.977  | 1.00 | 0.00 |
| ATOM<br>H | 2021 | HD1 | PHE | X | 133 | 9.352  | 7.263  | 7.476  | 1.00 | 0.00 |
| ATOM<br>H | 2022 | HD2 | PHE | X | 133 | 6.490  | 5.470  | 10.093 | 1.00 | 0.00 |
| ATOM<br>H | 2023 | HE1 | PHE | X | 133 | 7.914  | 9.263  | 7.271  | 1.00 | 0.00 |
| ATOM<br>H | 2024 | HE2 | PHE | X | 133 | 5.049  | 7.468  | 9.888  | 1.00 | 0.00 |
| ATOM<br>H | 2025 | HZ  | PHE | X | 133 | 5.762  | 9.367  | 8.477  | 1.00 | 0.00 |
| ATOM<br>N | 2026 | N   | TYR | X | 134 | 11.555 | 6.415  | 9.583  | 1.00 | 0.00 |
| ATOM<br>C | 2027 | CA  | TYR | X | 134 | 12.355 | 7.583  | 9.935  | 1.00 | 0.00 |
| ATOM<br>C | 2028 | C   | TYR | X | 134 | 13.491 | 7.803  | 8.951  | 1.00 | 0.00 |
| ATOM<br>O | 2029 | O   | TYR | X | 134 | 13.787 | 8.935  | 8.574  | 1.00 | 0.00 |
| ATOM<br>C | 2030 | CB  | TYR | X | 134 | 12.918 | 7.439  | 11.351 | 1.00 | 0.00 |
| ATOM<br>C | 2031 | CG  | TYR | X | 134 | 13.809 | 8.584  | 11.777 | 1.00 | 0.00 |
| ATOM<br>C | 2032 | CD1 | TYR | X | 134 | 13.283 | 9.846  | 12.013 | 1.00 | 0.00 |
| ATOM<br>C | 2033 | CD2 | TYR | X | 134 | 15.173 | 8.400  | 11.943 | 1.00 | 0.00 |
| ATOM<br>C | 2034 | CE1 | TYR | X | 134 | 14.092 | 10.896 | 12.401 | 1.00 | 0.00 |
| ATOM<br>C | 2035 | CE2 | TYR | X | 134 | 15.990 | 9.443  | 12.332 | 1.00 | 0.00 |
| ATOM<br>C | 2036 | CZ  | TYR | X | 134 | 15.447 | 10.690 | 12.559 | 1.00 | 0.00 |
| ATOM<br>O | 2037 | OH  | TYR | X | 134 | 16.257 | 11.732 | 12.948 | 1.00 | 0.00 |
| ATOM<br>H | 2038 | H   | TYR | X | 134 | 11.442 | 5.661  | 10.246 | 1.00 | 0.00 |
| ATOM<br>H | 2039 | HA  | TYR | X | 134 | 11.737 | 8.481  | 9.895  | 1.00 | 0.00 |
| ATOM<br>H | 2040 | 1HB | TYR | X | 134 | 12.067 | 7.367  | 12.031 | 1.00 | 0.00 |
| ATOM<br>H | 2041 | 2HB | TYR | X | 134 | 13.484 | 6.508  | 11.381 | 1.00 | 0.00 |
| ATOM<br>H | 2042 | HD1 | TYR | X | 134 | 12.211 | 10.002 | 11.885 | 1.00 | 0.00 |
| ATOM<br>H | 2043 | HD2 | TYR | X | 134 | 15.596 | 7.413  | 11.761 | 1.00 | 0.00 |
| ATOM<br>H | 2044 | HE1 | TYR | X | 134 | 13.664 | 11.882 | 12.582 | 1.00 | 0.00 |













































































































































































































































































































































































































































































































































































































































































































|      |      |      |     |   |     |        |        |         |      |      |
|------|------|------|-----|---|-----|--------|--------|---------|------|------|
| ATOM | 9949 | OXT  | VAL | X | 630 | 10.261 | 17.982 | -26.734 | 1.00 | 0.00 |
| O    |      |      |     |   |     |        |        |         |      |      |
| ATOM | 9950 | H    | VAL | X | 630 | 8.764  | 14.130 | -28.101 | 1.00 | 0.00 |
| H    |      |      |     |   |     |        |        |         |      |      |
| ATOM | 9951 | HA   | VAL | X | 630 | 9.902  | 15.683 | -26.077 | 1.00 | 0.00 |
| H    |      |      |     |   |     |        |        |         |      |      |
| ATOM | 9952 | HB   | VAL | X | 630 | 11.114 | 13.917 | -27.405 | 1.00 | 0.00 |
| H    |      |      |     |   |     |        |        |         |      |      |
| ATOM | 9953 | 1HG1 | VAL | X | 630 | 12.223 | 14.614 | -29.502 | 1.00 | 0.00 |
| H    |      |      |     |   |     |        |        |         |      |      |
| ATOM | 9954 | 2HG1 | VAL | X | 630 | 10.452 | 14.678 | -29.661 | 1.00 | 0.00 |
| H    |      |      |     |   |     |        |        |         |      |      |
| ATOM | 9955 | 3HG1 | VAL | X | 630 | 11.379 | 16.179 | -29.426 | 1.00 | 0.00 |
| H    |      |      |     |   |     |        |        |         |      |      |
| ATOM | 9956 | 1HG2 | VAL | X | 630 | 13.294 | 15.018 | -27.317 | 1.00 | 0.00 |
| H    |      |      |     |   |     |        |        |         |      |      |
| ATOM | 9957 | 2HG2 | VAL | X | 630 | 12.489 | 16.597 | -27.164 | 1.00 | 0.00 |
| H    |      |      |     |   |     |        |        |         |      |      |
| ATOM | 9958 | 3HG2 | VAL | X | 630 | 12.307 | 15.377 | -25.881 | 1.00 | 0.00 |
| H    |      |      |     |   |     |        |        |         |      |      |

**S5:** *R*-citalopram docked into hSERT model.
